# Supplementary material for: Lactobacillus rhamnosus GG supernatant promotes intestinal mucin production through regulating 5-HT4R and gut microbiota
Source: Royal Society of Chemistry journal article supplement (doi:10.1039/d2fo01900k), 2022-01-01
Supplement: d2fo01900k1.pdf [file d2fo01900k1.pdf]

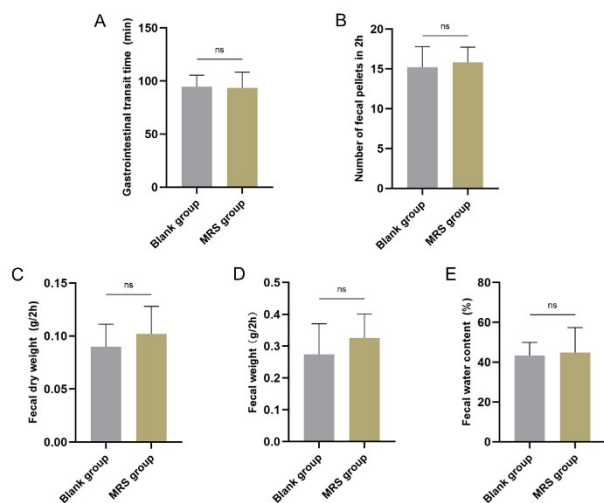

**Figure S1.** MRS showed no influence on defecation function of mice. (A) Gastrointestinal transit time. (B) Number of fecal pellets in 2h. (C) Fecal dry weight. (D) Fecal weight. (E) Fecal water content. LGGs, *Lactobacillus rhamnosus* GG; MRS, MRS Broth; Tegaserod, 5-HT<sub>4</sub>R agonist. ns,  $P > 0.05$ .
