# Supplementary figures and images for: Lactobacillus rhamnosus GG supernatant promotes intestinal mucin production through regulating 5-HT4R and gut microbiota
Source: Royal Society of Chemistry journal article supplement (doi:10.1039/d2fo01900k), 2022-01-01

## Raw images of western blot in Figure 2B

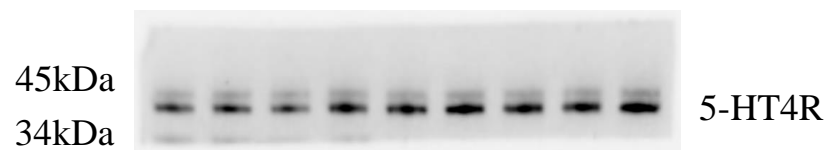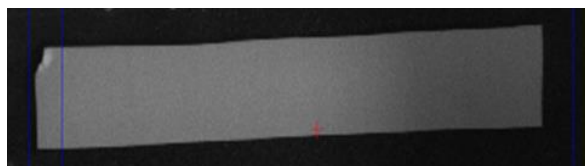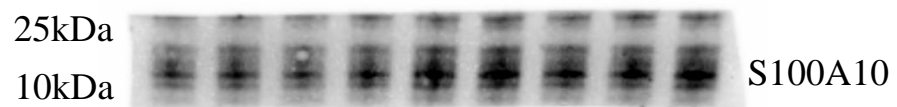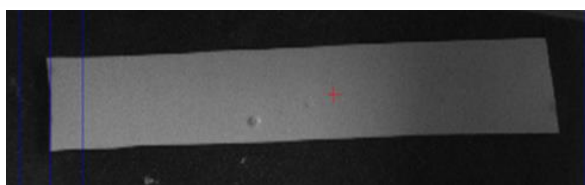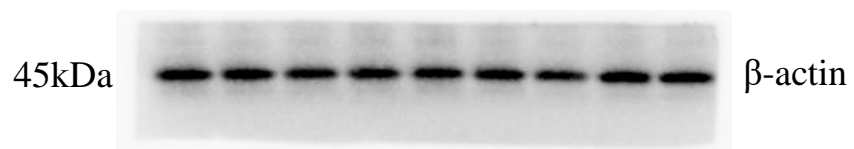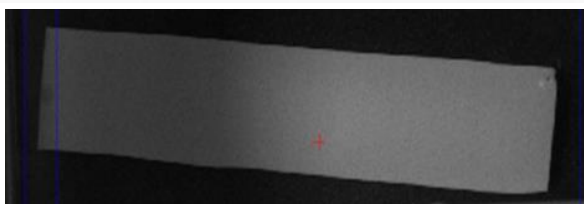

Supplement: d2fo01900k2.pdf [file d2fo01900k2.pdf]
